# Supplementary material for: Prognostic Significance of TWIST1, CD24, CD44, and ALDH1 Transcript Quantification in EpCAM-Positive Circulating Tumor Cells from Early Stage Breast Cancer Patients
Source: MDPI journal article supplement (doi:10.3390/cells8070652), 2019-06-29
Supplement: s1 [file s1]

## Supplemental Tables

**Supl. Table 1.** Clinical characteristics of the patients with early breast cancer (n=105).

| Qualitative Variable | Stem Cell Profile<br><i>CD44<sup>high</sup>/CD24<sup>-low</sup></i><br><i>ALDH1<sup>high</sup>/CD24<sup>-low</sup></i> |                   |                   | Mesenchymal Profile<br><i>TWIST1</i> |                   | Stem Cell and mesenchymal Profile<br><i>CD44<sup>high</sup>/CD24<sup>-low</sup></i><br><i>ALDH1<sup>high</sup>/CD24<sup>-low</sup></i><br><i>TWIST1</i> |                   |
|----------------------|------------------------------------------------------------------------------------------------------------------------|-------------------|-------------------|--------------------------------------|-------------------|---------------------------------------------------------------------------------------------------------------------------------------------------------|-------------------|
| Patients enrolled    | All<br>n (%)                                                                                                           | Positive<br>n (%) | Negative<br>n (%) | Positive<br>n (%)                    | Negative<br>n (%) | Positive<br>n (%)                                                                                                                                       | Negative<br>n (%) |
|                      | 100(100)                                                                                                               | 15(15.0)          | 85(85.0)          | 19(19.0)                             | 81(81.0)          | 7(7.0)                                                                                                                                                  | 93(93.0)          |
| <b>Menopausal</b>    |                                                                                                                        |                   |                   |                                      |                   |                                                                                                                                                         |                   |
| Pre                  | 91(91.0)                                                                                                               | 14(15.4)          | 77(84.6)          | 16(17.6)                             | 75(82.4)          | 6(6.60)                                                                                                                                                 | 85(93.4)          |
| Post                 | 9(9.0)                                                                                                                 | 1(11.1)           | 8(88.9)           | 3(33.3)                              | 6(66.7)           | 1(11.1)                                                                                                                                                 | 8(88.9)           |
|                      |                                                                                                                        | N.S               |                   | 0.366                                |                   | 0.494                                                                                                                                                   |                   |
| <b>Age, years</b>    |                                                                                                                        |                   |                   |                                      |                   |                                                                                                                                                         |                   |
| ≥ 50                 | 50(50.0)                                                                                                               | 7(14.0)           | 43(86.0)          | 9(18.0)                              | 41(82.0)          | 4(8.0)                                                                                                                                                  | 46(92.0)          |
| <50                  | 50(50.0)                                                                                                               | 8(16.0)           | 42(84.0)          | 10(20.0)                             | 40(80.0)          | 3(6.0)                                                                                                                                                  | 47(94.0)          |
|                      |                                                                                                                        | N.S               |                   | N.S                                  |                   | N.S                                                                                                                                                     |                   |
| <b>T Stage</b>       |                                                                                                                        |                   |                   |                                      |                   |                                                                                                                                                         |                   |
| T1                   | 34(34.0)                                                                                                               | 5(14.7)           | 29(85.3)          | 3(8.8)                               | 31(91.2)          | 2(5.9)                                                                                                                                                  | 32(94.1)          |
| T2/T3                | 66(66.0)                                                                                                               | 10(15.2)          | 56(84.8)          | 16(24.2)                             | 50(75.6)          | 5(7.6)                                                                                                                                                  | 61(92.4)          |
| P                    |                                                                                                                        | NS                |                   | 0.063                                |                   | 0.753                                                                                                                                                   |                   |
| <b>Grading</b>       |                                                                                                                        |                   |                   |                                      |                   |                                                                                                                                                         |                   |
| 1/2                  | 34(34.3)                                                                                                               | 7(20.6)           | 27(79.4)          | 5(14.7)                              | 29(85.3)          | 3(8.82)                                                                                                                                                 | 31(91.2)          |
| 3                    | 65(65.7)                                                                                                               | 8(12.3)           | 57(87.7)          | 13(20.0)                             | 52(80.0)          | 4(6.20)                                                                                                                                                 | 61(93.8)          |
| Missing values       | 1                                                                                                                      | 0.275             |                   | 0.514                                |                   | 0.689                                                                                                                                                   |                   |
| <b>LN</b>            |                                                                                                                        |                   |                   |                                      |                   |                                                                                                                                                         |                   |
| N0                   | 36(37.1)                                                                                                               | 5(13.9)           | 31(86.1)          | 3(8.33)                              | 33(91.7)          | 2(5.6)                                                                                                                                                  | 34(94.4)          |
| N1                   | 35(36.1)                                                                                                               | 4(11.4)           | 31(88.6)          | 7(20.0)                              | 28(80.0)          | 1(2.90)                                                                                                                                                 | 34(97.1)          |
| N2/N3                | 26(26.8)                                                                                                               | 6(23.1)           | 20(76.9)          | 9(34.6)                              | 17(65.4)          | 4(15.4)                                                                                                                                                 | 22(84.6)          |
| Missing values       | 3                                                                                                                      | 0.437             |                   | <b>0.036</b>                         |                   | 0.155                                                                                                                                                   |                   |
| <b>ER</b>            |                                                                                                                        |                   |                   |                                      |                   |                                                                                                                                                         |                   |
| Positive             | 62(63.9)                                                                                                               | 10(16.1)          | 52(83.9)          | 12(19.3)                             | 50(80.6)          | 4(6.4)                                                                                                                                                  | 58(93.5)          |
| Negative             | 35(36.1)                                                                                                               | 5(14.3)           | 30(85.7)          | 6(17.1)                              | 29(82.8)          | 3(8.6)                                                                                                                                                  | 32(91.4)          |
| Missing values       | 3                                                                                                                      | 0.640             |                   | 0.640                                |                   | 0.7                                                                                                                                                     |                   |
| <b>PR</b>            |                                                                                                                        |                   |                   |                                      |                   |                                                                                                                                                         |                   |
| Positive             | 51(52.6)                                                                                                               | 9(17.6)           | 42(82.3)          | 10(19.6)                             | 41(80.4)          | 4(7.80)                                                                                                                                                 | 47(92.2)          |
| Negative             | 46(47.4)                                                                                                               | 6(13.0)           | 40(87.0)          | 8(17.4)                              | 38(82.6)          | 3(6.5)                                                                                                                                                  | 43(93.5)          |
| Missing values       | 3                                                                                                                      | 0.585             |                   | 0.8                                  |                   | N.S                                                                                                                                                     |                   |
| <b>HER2</b>          |                                                                                                                        |                   |                   |                                      |                   |                                                                                                                                                         |                   |
| Positive             | 38(39.6)                                                                                                               | 4(10.8)           | 34(89.2)          | 2(5.40)                              | 36(94.6)          | 1(2.7)                                                                                                                                                  | 37(97.3)          |
| Negative             | 58(60.4)                                                                                                               | 10(15.9)          | 48(84.1)          | 16 (25.4)                            | 42(74.6)          | 6(9.5)                                                                                                                                                  | 52(90.5)          |
| Missing values       | 4                                                                                                                      | 0.362             |                   | <b>0.006</b>                         |                   | 0.238                                                                                                                                                   |                   |

**Supl. Table 2 :** quadraplex RT-qPCR for *CD24*, *CD44*, *ALDH1*, *HPRT*: Evaluation of intra- (n=3) and inter-assay (n=5) precision.

| <i>CD24</i>                        |               | <i>Intra-assay precision (n=3)</i> |                                      |     |
|------------------------------------|---------------|------------------------------------|--------------------------------------|-----|
| SKBR-3 cells                       | Cq (SD)       | CV%                                | Copies (SD)                          | CV% |
| <b>1</b>                           | 26.80 (0.12)  | 0.45                               | 1.6 ( $\pm 0.15$ ) x 10 <sup>2</sup> | 10  |
| <b>10</b>                          | 23.33 (0.25)  | 1.1                                | 3.3 ( $\pm 0.72$ ) x 10 <sup>3</sup> | 23  |
| <b>100</b>                         | 20.33 (0.19)  | 0.93                               | 4.4 ( $\pm 0.72$ ) x 10 <sup>4</sup> | 18  |
| <b>1000</b>                        | 16.97 (0.087) | 0.51                               | 801 ( $\pm 0.62$ ) x 10 <sup>5</sup> | 7.7 |
| <i>Inter-assay precision(n=5)</i>  |               |                                    |                                      |     |
| <b>1000 SKBR-3</b>                 | 16.99 (0.19)  | 1.1                                | 8 ( $\pm 0.13$ ) x 10 <sup>5</sup>   | 16  |
| <i>CD44</i>                        |               | <i>Intra-assay precision (n=3)</i> |                                      |     |
| SKBR-3 cells                       | Cq (SD)       | CV%                                | Copies (SD)                          | CV% |
| <b>1</b>                           | 31.68 (0.026) | 0.082                              | 0.81 ( $\pm 0.021$ )                 | 2.6 |
| <b>10</b>                          | 28.72 (0.28)  | 0.97                               | 1.5 ( $\pm 0.38$ ) x 10              | 26  |
| <b>100</b>                         | 25.50 (0.35)  | 1.4                                | 3.5 ( $\pm 1.1$ ) x 10 <sup>2</sup>  | 30  |
| <b>1000</b>                        | 21.84 (0.15)  | 0.69                               | 1.2 ( $\pm 0.18$ ) x 10 <sup>4</sup> | 15  |
| <i>Inter-assay precision(n=5)</i>  |               |                                    |                                      |     |
| <b>1000 SKBR-3</b>                 | 21.56 (0.20)  | 0.93                               | 1.6 ( $\pm 0.32$ ) x 10 <sup>4</sup> | 20  |
| <i>ALDH1</i>                       |               | <i>Intra-assay precision (n=3)</i> |                                      |     |
| SKBR-3 cells                       | Cq (SD)       | CV%                                | Copies (SD)                          | CV% |
| <b>1</b>                           | 31.64 (0.16)  | 0.51                               | 0.82 ( $\pm 0.12$ )                  | 15  |
| <b>10</b>                          | 28.19 (0.067) | 0.24                               | 2.4 ( $\pm 0.16$ ) x 10              | 6,6 |
| <b>100</b>                         | 25.07 (0.23)  | 0.92                               | 5.1 ( $\pm 1.2$ ) x 10 <sup>2</sup>  | 24  |
| <b>1000</b>                        | 21.72 (0.15)  | 0.69                               | 1.3 ( $\pm 0.20$ ) x 10 <sup>4</sup> | 14  |
| <i>Inter-assay precision (n=5)</i> |               |                                    |                                      |     |
| <b>1000 SKBR-3</b>                 | 21.39 (0.18)  | 0.84                               | 1.9 ( $\pm 0.33$ ) x 10 <sup>4</sup> | 18  |
| <i>HPRT</i>                        |               | <i>Intra-assay precision (n=3)</i> |                                      |     |
| SKBR-3 cells                       | Cq (SD)       | CV%                                | Copies (SD)                          | CV% |
| <b>1</b>                           | 30.64 (0.21)  | 0.68                               | 8.4 ( $\pm 0.16$ )                   | 20  |
| <b>10</b>                          | 28.32 (0.25)  | 0.88                               | 8.0 ( $\pm 0.20$ ) x 10              | 25  |
| <b>100</b>                         | 25.59 (0.23)  | 0.90                               | 1.0 ( $\pm 0.27$ ) x 10 <sup>3</sup> | 24  |
| <b>1000</b>                        | 21.97 (0.24)  | 1.1                                | 3.7 ( $\pm 0.18$ ) x 10 <sup>4</sup> | 23  |
| <i>Inter-assay precision (n=5)</i> |               |                                    |                                      |     |
| <b>1000 SKBR-3</b>                 | 21.71 (0.18)  | 0.83                               | 4.7 ( $\pm 0.81$ ) x 10 <sup>4</sup> | 17  |

**Supl. Table 3.** Correlation of *TWIST1*, *CD44*<sup>high</sup>/*CD24*<sup>-/low</sup> and/or *ALDH1*<sup>high</sup>/*CD24*<sup>-/low</sup> and the co-expression of *TWIST1* and *CD44*<sup>high</sup>/*CD24*<sup>-/low</sup> and/or *ALDH1*<sup>high</sup>/*CD24*<sup>-/low</sup> with the patients' clinical outcomes.

| Qualitative Variable | Stem Cell Profile                                                                                                         |                 | Mesenchymal Profile |                 | Stem Cell and mesenchymal Profile                                                                                                          |                 |
|----------------------|---------------------------------------------------------------------------------------------------------------------------|-----------------|---------------------|-----------------|--------------------------------------------------------------------------------------------------------------------------------------------|-----------------|
|                      | <i>CD44</i> <sup>high</sup> / <i>CD24</i> <sup>-/low</sup><br><i>ALDH1</i> <sup>high</sup> / <i>CD24</i> <sup>-/low</sup> |                 | <i>TWIST1</i>       |                 | <i>CD44</i> <sup>high</sup> / <i>CD24</i> <sup>-/low</sup><br><i>ALDH1</i> <sup>high</sup> / <i>CD24</i> <sup>-/low</sup><br><i>TWIST1</i> |                 |
|                      | <i>Positive</i>                                                                                                           | <i>Negative</i> | <i>Positive</i>     | <i>Negative</i> | <i>Positive</i>                                                                                                                            | <i>Negative</i> |
| <b>Recurrence</b>    |                                                                                                                           |                 |                     |                 |                                                                                                                                            |                 |
| Yes                  | 6(24.0%)                                                                                                                  | 19(76.0%)       | 9(36.0%)            | 16(64.0%)       | 4(16.0%)                                                                                                                                   | 21(84.0%)       |
| No                   | 9(12.0%)                                                                                                                  | 66(88.0%)       | 10(13.3%)           | 65(86.7%)       | 3(40.0%)                                                                                                                                   | 72(96.0%)       |
| P <sup>a</sup>       | 0.194                                                                                                                     |                 | <b>0.019</b>        |                 | 0.063                                                                                                                                      |                 |
| <b>Death</b>         |                                                                                                                           |                 |                     |                 |                                                                                                                                            |                 |
| Yes                  | 4(28.6%)                                                                                                                  | 10(71.4%)       | 6(42.9%)            | 8(57.1%)        | 3(21.4%)                                                                                                                                   | 11(78.6%)       |
| No                   | 11(12.8%)                                                                                                                 | 75(87.2%)       | 13(15.1%)           | 73(84.9%)       | 4(4.7%)                                                                                                                                    | 82(95.3%)       |
| P <sup>a</sup>       | 0.217                                                                                                                     |                 | <b>0.024</b>        |                 | 0.055                                                                                                                                      |                 |

<sup>a</sup> Fisher's Exact Test
